# Supplementary material for: Impact of the Copper Second Coordination Sphere on Catalytic Performance and Substrate Specificity of a Bacterial Lytic Polysaccharide Monooxygenase
Source: PubMed Central journal article supplement (PMC11137697; doi:10.1021/acsomega.4c02666), 2024-05-15
Supplement: ao4c02666_si_001.pdf [file ao4c02666_si_001.pdf]

## Supporting Information for

# **Impact of the copper second coordination sphere on catalytic performance and substrate specificity of a bacterial LPMO**

Kelsi R. Hall<sup>1,2</sup>, Maja Mollatt<sup>1</sup>, Zarah Forsberg<sup>1</sup>, Ole Golten<sup>1</sup>, Lorenz Schwaiger<sup>3</sup>, Roland Ludwig<sup>3</sup>, Iván Ayuso-Fernández<sup>1</sup>, Vincent G.H Eijsink<sup>1</sup>, Morten Sørlie<sup>1\*</sup>

<sup>1</sup> Faculty of Chemistry, Biotechnology and Food Science, Norwegian University of Life Sciences (NMBU), 1432, Ås, Norway.

<sup>2</sup> Current address – School of Biological Sciences, University of Canterbury, Christchurch 8140, New Zealand.

<sup>3</sup> Department of Food Science and Technology, Institute of Food Technology, University of Natural Resources and Life Sciences, Vienna (BOKU), 1190 Vienna, Austria.

\*Correspondence to: [morten.sorlie@nmbu.no](mailto:morten.sorlie@nmbu.no)

### **This PDF file includes:**

- |                                                 |           |
|-------------------------------------------------|-----------|
| 1. List of Supplementary Figures & Tables       | page 2    |
| 2. Supplementary Figures (1-5) and Tables (1-3) | page 3-11 |
| 3. Supplementary References                     | page 12   |

## 1. List of Supplementary Figures and Tables

**Figure S1.** Phylogenetic tree of AA10 LPMOs.

**Table S1:** Primers used for site directed mutagenesis of *MaAA10B*.

**Table S2:** Theoretical extinction coefficients for all proteins purified in this study.

**Figure S2.** Prevalence of second sphere residue in cellulose-active AA10 LPMOs.

**Figure S3.** Structural superposition of second sphere residues in *MaAA10B* and *ScAA10C*.

**Supplementary Discussion.** Mutagenesis strategy.

**Table S3.** Initial catalytic rates of *MaAA10B* variants.

**Figure S4.** Binding of full length and truncated *MaAA10B* to PASC and  $\beta$ -chitin.

**Figure S5.** Release of oxidised products by WT *MaAA10B* and the HEY and REY mutants in reactions supplemented with  $H_2O_2$  and assessment of enzyme inactivation.

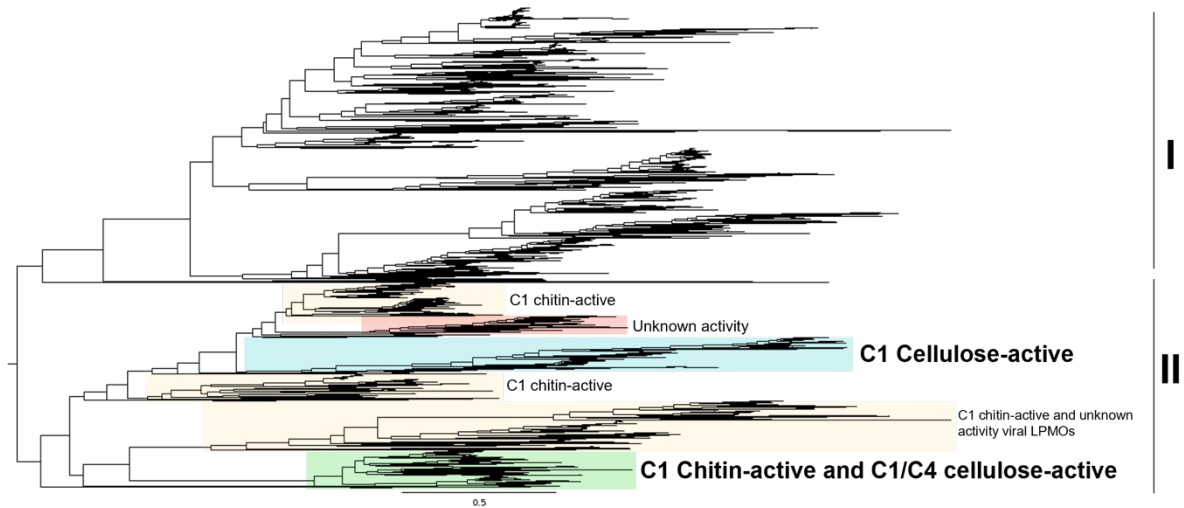

**Figure S1. Phylogenetic tree of AA10 LPMOs.** 3129 unique AA10 LPMO sequences were retrieved from dbCAN<sup>1</sup> (version 07262023) and aligned using MAFFT<sup>2</sup> under automatic selection of parameters. The tree was built using fasttree with default parameters. The overall topology of the tree consisted of two clades: Clade I, corresponding to C1 chitin-active LPMOs, and Clade II, with several activities. To identify functional subclades in clade II, sequences of known activity according to Forsberg *et al.*, (2019)<sup>3</sup> and Votvik *et al.*, (2023)<sup>4</sup> were added to the dataset. The LPMOs used in this study for assessing the occurrence of second sphere motifs appear in the blue and green subclades.

**Table S1: Primers used for site directed mutagenesis of *MaAA10B*.** The underlined sequences show the mutated codon. Note that the template gene was codon-optimised for *E. coli* expression.

| <b>Construct</b>              | Forward primer (5'→3')                                             | Reverse primer (5'→3')                                            |
|-------------------------------|--------------------------------------------------------------------|-------------------------------------------------------------------|
| <i>MaAA10B</i> (H <u>Q</u> F) | CCAATCG <u>TTTT</u> TACCTGTGCAGC<br>GATGTTGACTTTGGCGGTTCT          | CACAGGT <u>AAA</u> ACGATTGGTCCAG<br>GTGTGACGCCTGCCAGATGG          |
| <i>MaAA10B</i> (H <u>E</u> Y) | CACCTGGACG <u>AA</u> TTCGTATTACC<br>TGTGCAGCGATGTTGACTTTG          | ATACGATT <u>CGTCC</u> AGGTGTGACG<br>CCTGCCAGATGGTATAACACG         |
| <i>MaAA10B</i> ( <u>R</u> QY) | GGCAG <u>CG</u> GTCAGGCCTGGACCA<br>ATCGTATTACCTGTGCAGCGA           | CCAGGCCTG <u>ACC</u> GCTGCCAGATG<br>GTATAACACGACATGGCGGCC         |
| <i>MaAA10B</i> (H <u>E</u> F) | TGGACG <u>AA</u> T <u>CGTTTT</u> TACCTGTG<br>CAGCGATGTTGACTTTGGCGG | GGT <u>AAA</u> ACGAT <u>TC</u> GTCCAGGTGT<br>GACGCCTGCCAGATGGTATA |
| pRSETB backbone + CBM*        | TGCAGCGATGTTGACTTTGGCG<br>GTTCTGGT                                 | GCGACGATACGGCGTTGACATAT<br>GTATATCTC                              |

\* Variants which were ordered as gene fragments (RQF, REY, REF and REFex) were cloned into a pRSETB backbone which was amplified alongside the linker region and the CBM2.

**Table S2: Theoretical extinction coefficients for all proteins purified in this study.**

Coefficients were calculated using the ExPASy ProtParam tool.

| <b>Construct</b>            | <b>Extinction Coefficient<br/>(M<sup>-1</sup>. cm<sup>-1</sup>)</b> |
|-----------------------------|---------------------------------------------------------------------|
| WT <i>MaAA10B</i>           | 93,765                                                              |
| <i>MaAA10B</i> <b>HQF</b>   | 92,275                                                              |
| <i>MaAA10B</i> <b>HEY</b>   | 93,765                                                              |
| <i>MaAA10B</i> <b>RQY</b>   | 93,765                                                              |
| <i>MaAA10B</i> <b>HEF</b>   | 92,275                                                              |
| <i>MaAA10B</i> <b>RQF</b>   | 92,275                                                              |
| <i>MaAA10B</i> <b>REY</b>   | 93,765                                                              |
| <i>MaAA10B</i> <b>REF</b>   | 92,275                                                              |
| <i>MaAA10B</i> <b>REFex</b> | 92,275                                                              |
| WT <i>ScAA10C</i>           | 75,755                                                              |

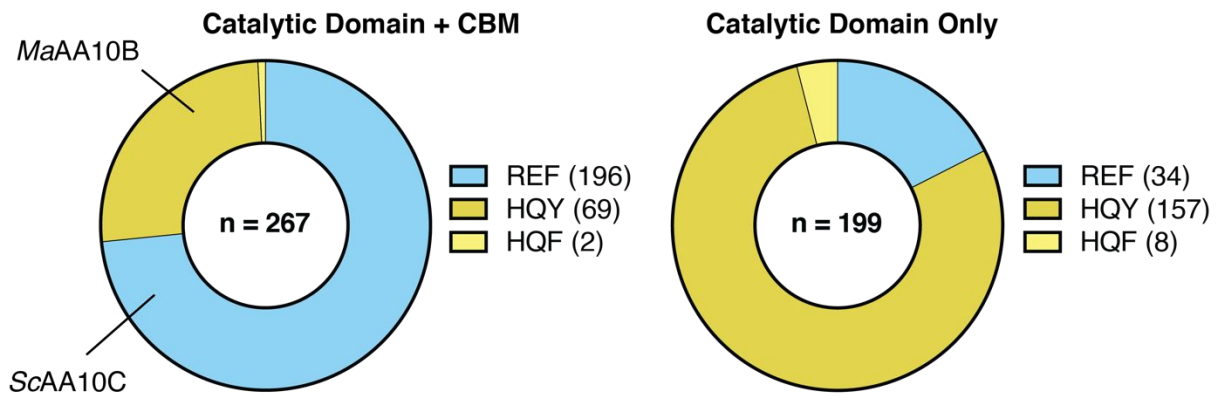

**Figure S2. Prevalence of second sphere residue in cellulose-active AA10 LPMOs.** All cellulose-active AA10 LPMOs (including those with mixed activity) from the CAZy database (n = 466) were aligned to determine the frequency of different amino acids at positions 1, 2 and 3 (see Figure 1). Prior to the alignment, the sequences were separated into two groups based on whether they contained a CBM or only a catalytic domain. The amino acid combinations found in *MaAA10B* (HQY) and *ScAA10C* (REF) are shown in darker yellow and blue respectively.

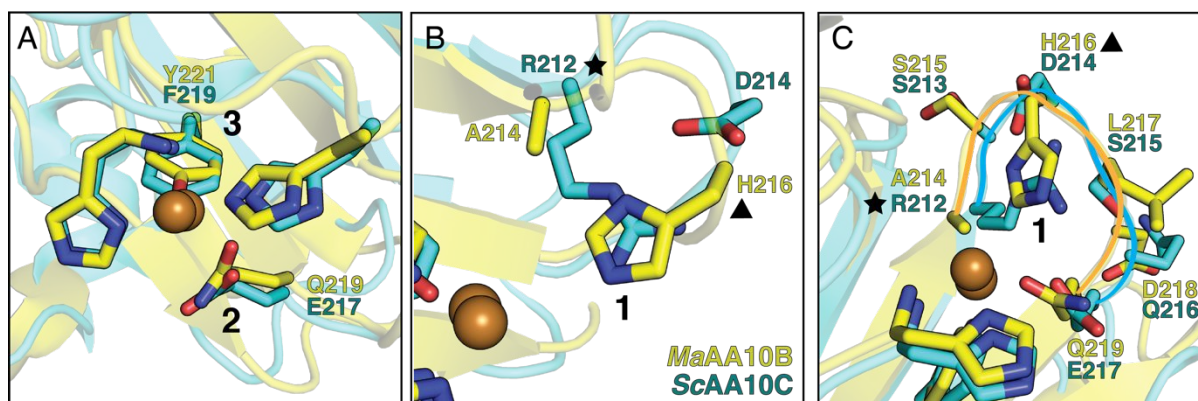

**Figure S3. Structural superposition of second sphere residues in *MaAA10B* (yellow carbons; PDB 5OPF) and *ScAA10C* (blue carbons; PDB 4OY7).** The structural alignment of *MaAA10B* and *ScAA10C* was performed using the align function in PyMOL. (A) View highlighting positions 2 (glutamine/glutamate) and 3 (tyrosine/phenylalanine). The histidine brace and bound copper ion of both enzymes are shown for reference. Side chains at position 1 are not shown for a clearer view of positions 2 and 3. (B) View highlighting position 1 (histidine/arginine). For clarity the histidine brace and the glutamate/glutamine at position 2 are not shown. The side chains of the histidine and arginine are in the same position in the active site, but the histidine (▲) originates from a different position in the main chain compared to the arginine (★). An aspartate (D214) occurs at the equivalent position of the histidine in *ScAA10C* and an alanine (A214) is located at the equivalent position of the arginine in *MaAA10B*. The closest distance between the headgroups of Arg<sup>212</sup> and Asp<sup>214</sup> in *ScAA10C* is 2.8 Å. (C) View highlighting the loop regions in which the second sphere residues shown in panel B are located; the loops are shown as solid lines in yellow (*MaAA10B*) or blue (*ScAA10C*). In one of the *MaAA10B* variants (REFex) the complete 214-219 loop was exchanged; see main text and the Supplementary Discussion below for more details.

### Supplementary Discussion: mutagenesis strategy

Although the headgroups of the histidine (in HQY) and arginine (in REF) residues are in the same position in the active sites of *MaAA10B* and *ScAA10C* the main chains differ (Figure S3B). Consequently, the histidine could not be directly mutated to an arginine, as this would cause steric hindrance. Therefore, the histidine was mutated to a smaller amino acid, glycine, to make room for the side chain of an arginine, which was introduced to replace alanine at position 214. Ideally, the histidine residue in *MaAA10B* would have been replaced with an aspartate, as this residue is present in *ScAA10C*, but modelling studies indicated that this would lead to steric hindrance in arginine containing *MaAA10B*, due to other differences in the loop regions of the two enzymes (Figures S3B and C). In addition to variants containing this double mutation (H216G/ A214R), referred to as RQY, REY, RQF and REF, one additional triple variant was generated, referred to as REFex. In this variant the complete loop from residues Ala<sup>214</sup>- Gln<sup>219</sup> (ASHLDQ), which includes His<sup>216</sup> at position 1 and Gln<sup>219</sup> at position 2, was replaced by the corresponding loop in *ScAA10C* (residues Arg<sup>212</sup>-Glu<sup>217</sup>; RSDSQE), including Arg<sup>212</sup> at position 1 and Glu<sup>217</sup> in position 2. One motivation for this mutation was to investigate the importance of the salt bridge between Arg<sup>212</sup> and Asp<sup>214</sup>.



**Table S3. Initial catalytic rates of *MaAA10B* variants.** The values provided are the initial rate of the release of oxidised products from PASC or  $\beta$ -chitin ( $\mu\text{M}/\text{min}$ ) under apparent monooxygenase conditions (Figure 2A and B) and the initial rate of the oxidase activity ( $\text{s}^{-1}$ ) (Figure 2C). The rates were determined by fitting the data by linear regression. These rates were used to calculate the fold change in activity reported in Figure 2D.

|                               | <b>PASC (<math>\mu\text{M}/\text{min}</math>)</b> | <b><math>\beta</math>-chitin (<math>\mu\text{M}/\text{min}</math>)</b> | <b>Oxidase (<math>\text{s}^{-1}</math>)</b> |
|-------------------------------|---------------------------------------------------|------------------------------------------------------------------------|---------------------------------------------|
| WT (HQY)                      | $0.12 \pm 0.004$                                  | $0.32 \pm 0.03$                                                        | $0.019 \pm 0.0003$                          |
| HQ <u>F</u>                   | $0.019 \pm 0.005$                                 | $0.006 \pm 0.002$                                                      | $0.0002 \pm 0.00009$                        |
| H <u>E</u> Y                  | $0.65 \pm 0.04$                                   | $5.3 \pm 0.5$                                                          | $0.1 \pm 0.02$                              |
| <u>R</u> QY                   | $0.0032 \pm 0.0006$                               | $0.01 \pm 0.007$                                                       | $0.00013 \pm 0.00008$                       |
| H <u>E</u> F                  | $0.017 \pm 0.001$                                 | $0.10 \pm 0.006$                                                       | $0.0034 \pm 0.0002$                         |
| <u>R</u> EY                   | $0.18 \pm 0.03$                                   | $0.26 \pm 0.03$                                                        | $0.033 \pm 0.003$                           |
| <u>R</u> Q <u>F</u>           | $0.0088 \pm 0.0005$                               | $0.008 \pm 0.004$                                                      | $0.0033 \pm 0.0003$                         |
| <u>R</u> E <u>F</u>           | $0.016 \pm 0.005$                                 | $0.09 \pm 0.01$                                                        | $0.0067 \pm 0.0002$                         |
| <u>R</u> E <u>F</u> <u>ex</u> | $0.013 \pm 0.004$                                 | $0.012 \pm 0.002$                                                      | $0.0084 \pm 0.0004$                         |

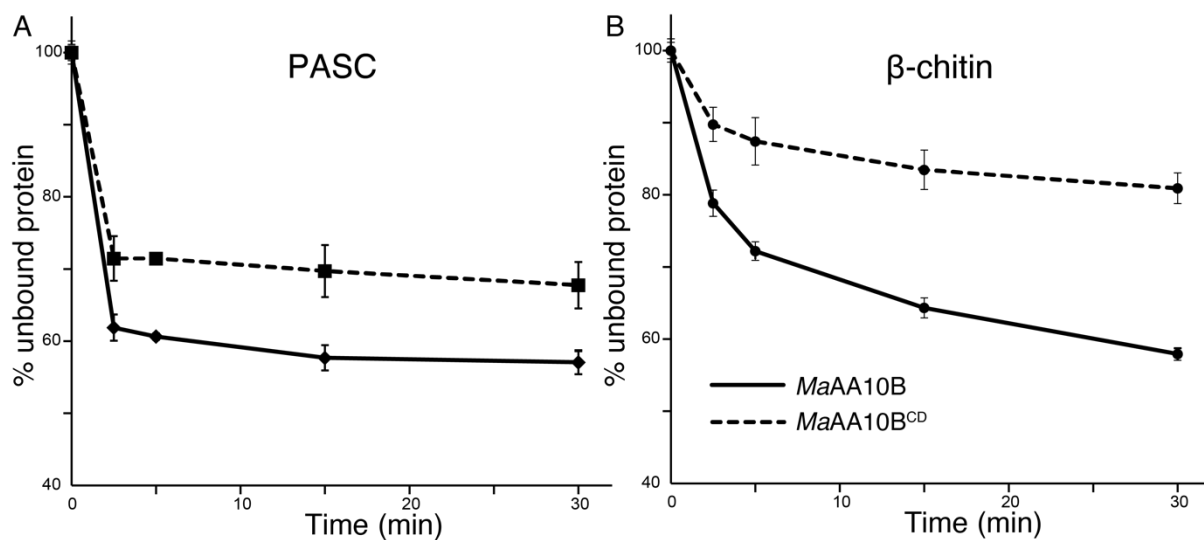

**Figure S4. Binding of full length and truncated *MaAA10B* to PASC (A) and  $\beta$ -chitin (B).** Solid lines represent binding of full-length *MaAA10B* (catalytic domain-linker-CBM2), whereas the dashed lines show binding for the catalytic domain of *MaAA10B* (*MaAA10B<sup>CD</sup>*). 3  $\mu$ M LPMO was incubated with 0.5 % (w/v) PASC (A) or 1% (w/v)  $\beta$ -chitin (B) in 20 mM sodium phosphate, pH 6.0, at 40 °C and 1000 rpm. Error bars show the standard deviation of triplicate reactions.

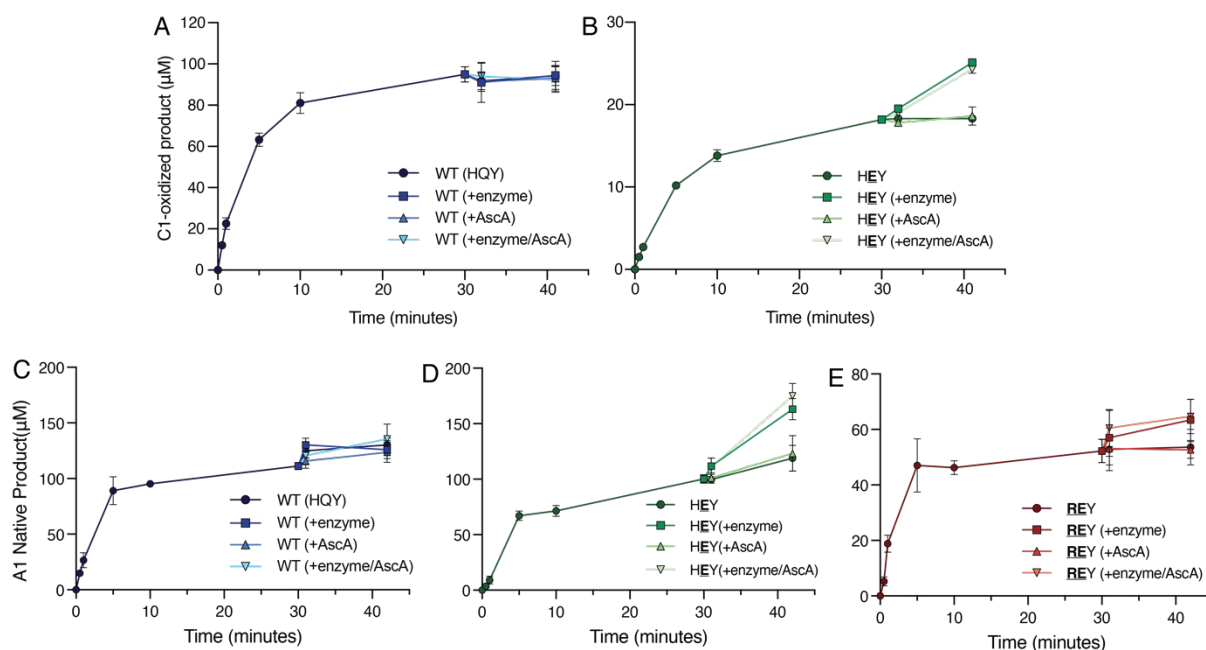

**Figure S5. Release of oxidised products by WT *MaAA10B* and the HEY and REY mutants in reactions supplemented with H<sub>2</sub>O<sub>2</sub> and assessment of enzyme inactivation.**

All reactions were performed at 40 °C, 1000 rpm and contained 1 µM LPMO, 100 µM H<sub>2</sub>O<sub>2</sub>, and 0.1% (w/v) PASC (A, B) or 1% (w/v) β-chitin (C, D & E) in 20 mM sodium phosphate, pH 6.0. The reactions were initiated with the addition of 1 mM ascorbate. After 30 minutes, reactions were split and an additional 1 µM enzyme (squares, □), 1 mM ascorbate (triangles, Δ) or both enzyme and ascorbate (inverted triangle, ▽), or buffer only (circles, ○) were added to the reaction. Note that, within the time frame used here, addition of fresh enzyme to a reaction mixture that is depleted for H<sub>2</sub>O<sub>2</sub> will not lead to detectable additional product formation. Error bars show the standard deviations of triplicate reactions.

## Supplementary References.

(1) Zhang, H.; Yohe, T.; Huang, L.; Entwistle, S.; Wu, P.; Yang, Z.; Busk, P. K.; Xu, Y.; Yin, Y. dbCAN2: A meta server for automated carbohydrate-active enzyme annotation. *Nucleic Acids Res.* **2018**, *46*, W95-W101.

(2) Katoh, K.; Misawa, K.; Kuma, K.; Miyata, T. MAFFT: A novel method for rapid multiple sequence alignment based on fast Fourier transform. *Nucleic Acids Res.* **2002**, *30*, 3059-3066.

(3) Forsberg, Z.; Sørli, M.; Petrovic, D.; Courtade, G.; Achmann, F. L.; Vaaje-Kolstad, G.; Bissaro, B.; Røhr, Å. K.; Eijsink, V. G. H. Polysaccharide degradation by lytic polysaccharide monooxygenases. *Current Opinion in Structural Biology* **2019**, *59*, 54-64.

(4) Votvik, A. K.; Røhr, Å. K.; Bissaro, B.; Stepanov, A. A.; Sørli, M.; Eijsink, V. G. H.; Forsberg, Z. Structural and functional characterization of the catalytic domain of a cell-wall anchored bacterial lytic polysaccharide monooxygenase from *Streptomyces coelicolor*. *Sci. Rep.* **2023**, *13*, 5345.
